# Supplementary material for: Engineering surfaces to improve xylene gas sensing performance in ZnCo2O4 porous architectures
Source: Royal Society of Chemistry journal article supplement (doi:10.1039/d4nj01803f), 2024-01-01
Supplement: d4nj01803f1.pdf [file d4nj01803f1.pdf]

### Electronic Supplementary Information for

Engineering surfaces to improve xylene gas sensing performance in ZnCo<sub>2</sub>O<sub>4</sub> porous architectures

Chenlu Hu<sup>a</sup>, Yanxu Feng<sup>a</sup>, Mengying Du<sup>a</sup>, Lifang Zhang<sup>a</sup>, Rui Jiang<sup>a</sup>, Shuangming Wang<sup>a\*</sup>, Jing Cao<sup>b\*</sup>

<sup>a</sup>College of Physics & Materials Science, Tianjin Normal University, Tianjin 300387, People's Republic of China

<sup>b</sup>College of Physical Science and Technology, Tiangong University, Tianjin 300387, People's Republic of China

---

\*E-mail: wsm116@tjnu.edu.cn; caojing@tiangong.edu.cn

The preparation process of the target gases: All target gases with specific concentrations were prepared by evaporating a certain amount of corresponding reagent liquid in a 1 L testing bottle. The corresponding reagent liquid was injected into testing bottle by a microsyringe and the injection volume had been calibrated by the following formula:

$$Q = (V \times C \times M) / (22.4 \times d \times \rho) \times 10^{-9} \times (273 + T_R) / (273 + T_B)$$

In which Q was the appropriate liquid volume (mL); V was the volume of the testing bottle (mL); C was the designed concentration of corresponding gas (ppm); M was the molecular weight of the substance (g); d was the purity of the liquid;  $\rho$  was the density of the liquid ( $\text{g}/\text{cm}^3$ );  $T_R$  ( $^{\circ}\text{C}$ ) and  $T_B$  ( $^{\circ}\text{C}$ ) was the testing environment and working temperature, respectively.

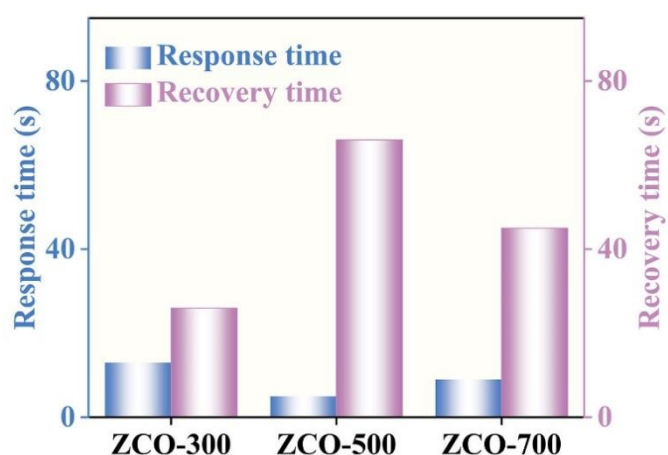

**Fig. S1** The response/recovery time of ZCO-300, ZCO-500 and ZCO-700 sensor to 200 ppm xylene gas at 170  $^{\circ}\text{C}$ .
